# Supplementary material for: Comparative membrane proteomics: a technical advancement in the search of renal cell carcinoma biomarkers
Source: Royal Society of Chemistry journal article supplement (doi:10.1039/c5mb00020c), 2015-04-15
Supplement: c5mb00020c1.pdf [file c5mb00020c1.pdf]

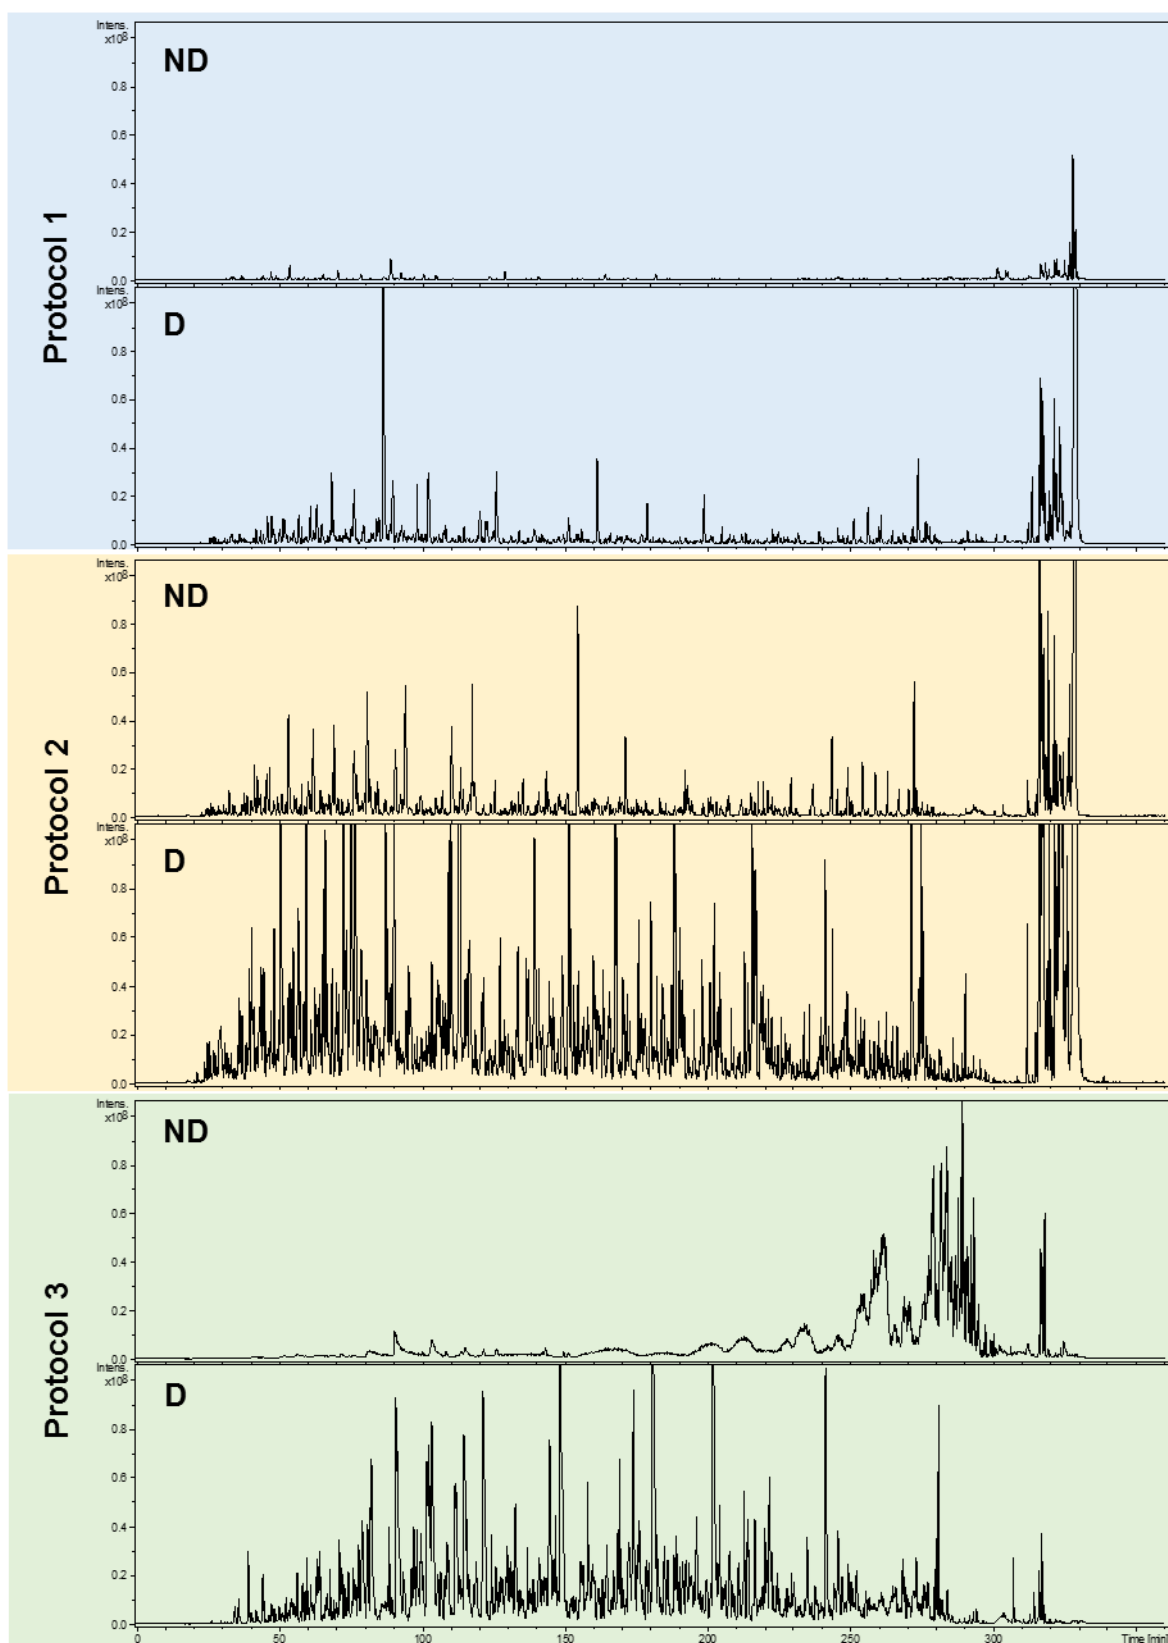

ESI, Fig. 1 - Base Peak Chromatograms of the LC-ESI-MS/MS analysis of ANK MD. One representative BPC is shown for each condition tested.
