# Supplementary material for: Comparative membrane proteomics: a technical advancement in the search of renal cell carcinoma biomarkers
Source: Royal Society of Chemistry journal article supplement (doi:10.1039/c5mb00020c), 2015-04-15
Supplement: c5mb00020c2.pdf [file c5mb00020c2.pdf]

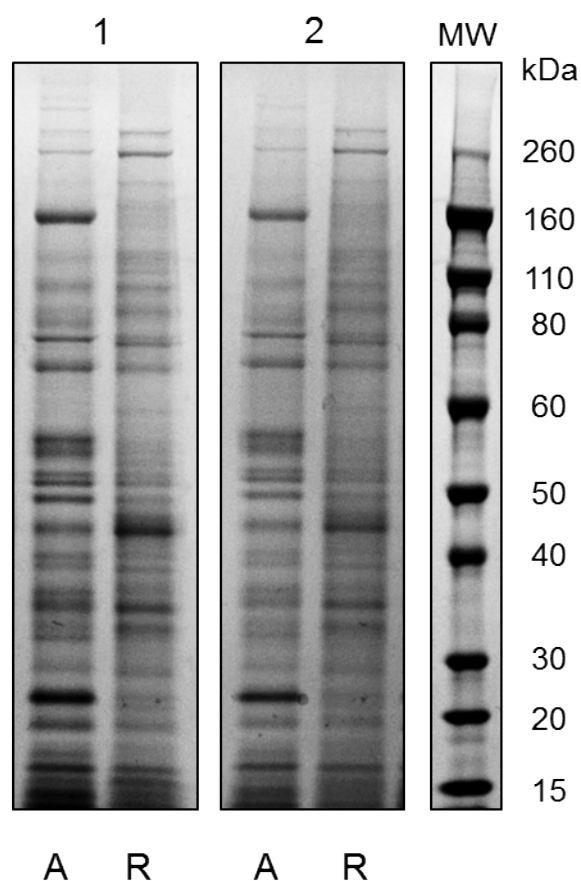

ESI, Fig. S2 – **MD protein profiles before and after delipidation.** NuPAGE4-12%/CBB staining of ANK and RCC MD proteins 1) before delipidation (loading 10  $\mu$ g based on BCA protein assay) and 2) after delipidation, loading equal aliquots of both samples, considering a theoretical protein content of 10  $\mu$ g. A = ANK; R = RCC.
